# Supplementary material for: Uncovering the Horseshoe Effect in Microbial Analyses
Source: PubMed Central journal article supplement (PMC5320001; doi:10.1128/msystems.00166-16), 2017-02-21

a

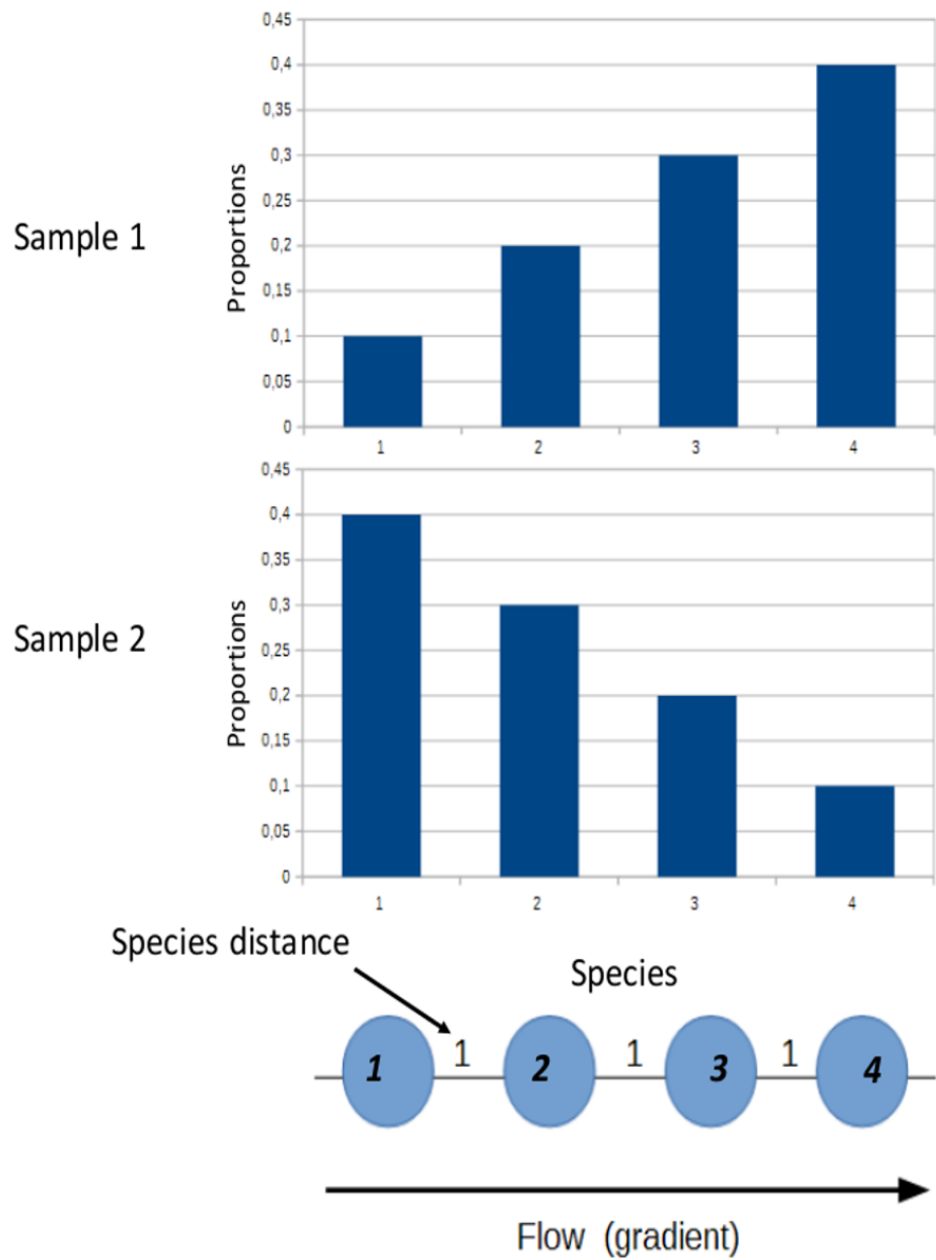

b

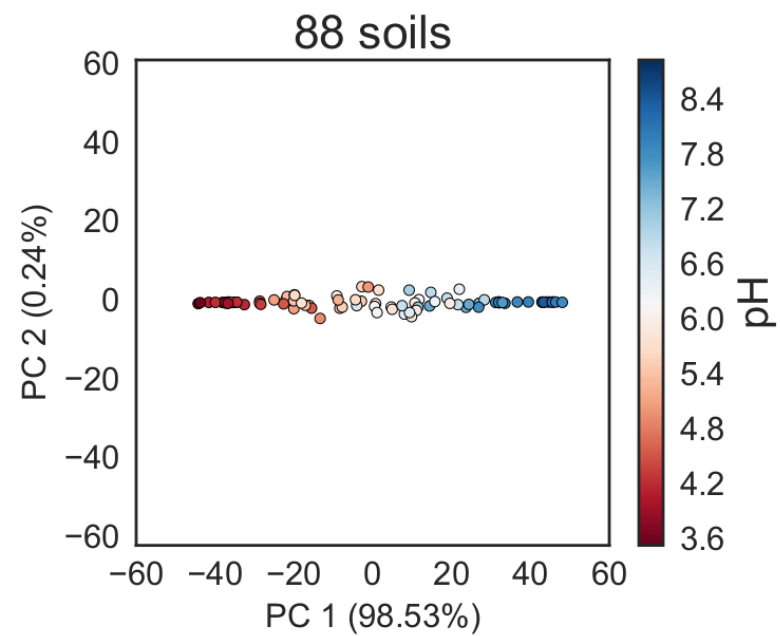

c

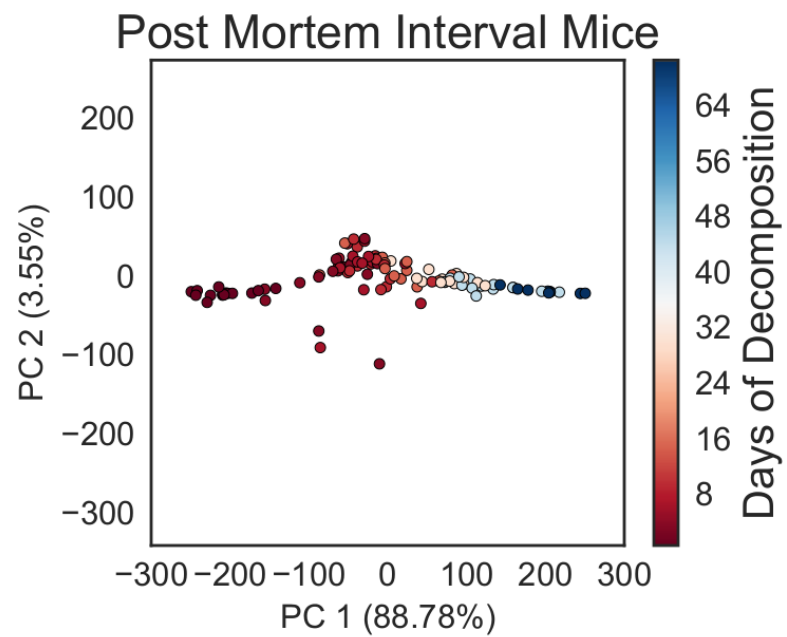

Supplement: sys001172088sf1.pdf [file sys001172088sf1.pdf]
