# Supplementary material for: Uncovering the Horseshoe Effect in Microbial Analyses
Source: PubMed Central journal article supplement (PMC5320001; doi:10.1128/msystems.00166-16), 2017-02-21

OTU = 4301099

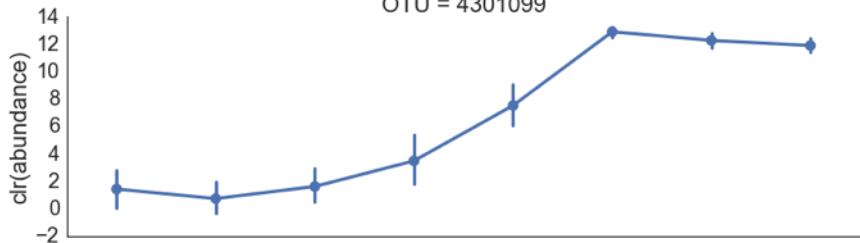

OTU = 4482362

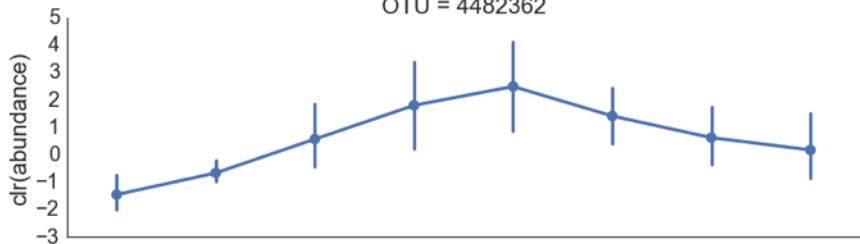

OTU = 46026

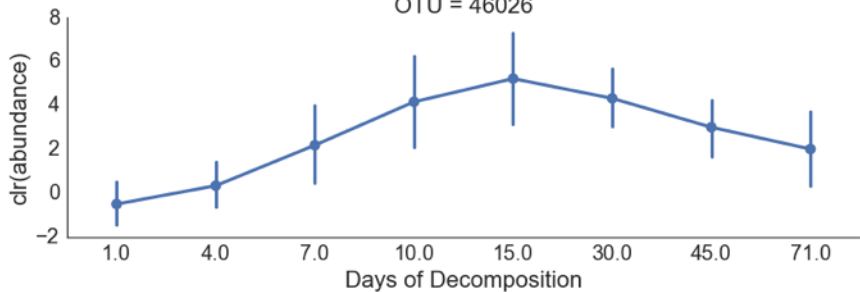

Supplement: sys001172088sf2.pdf [file sys001172088sf2.pdf]
